# Supplementary material
Source: publisher site journal article supplement (https://www.dovepress.com/article/546164)
Supplement: Supplementary file 1 [file 546164%20%252509Supplementary%20Table.docx]

**Table S1** Utilization of PD-1 Inhibitors in Training and Verification groups

| **PD-1 inhibitors** | **Dose(mg)** | **All patients（N=355）** | **Training group（N=249）** | **Verification group（N=106）** |
| --- | --- | --- | --- | --- |
| **Tislelizumab** | 200 | 73 | 58 | 15 |
| **Camrelizumab** | 200 | 159 | 110 | 49 |
| **Sintilimab** | 200 | 80 | 50 | 30 |
| **Toripalimab** | 240 | 37 | 27 | 10 |
| **Pembrolizumab** | 200 | 6 | 4 | 2 |

PD-1, Programmed death-1

**Table S2** Calculation Formulas for Fourteen Nutritional-Immune-Inflammatory Indicators

| **Nutritional-immune-inflammatory index** | **Computational formula** |
| --- | --- |
| PLR | **Platelet count (×10^9/L)/lymphocyte count (×10^9/L)** |
| NLR | **Neutrophil count (×10^9/L)/lymphocyte count (×10^9/L)** |
| LMR | **Lymphocyte count (×10^9/L)/monocyte count (×10^9/L)** |
| SII | **Platelet count (×10^9/L) × NLR** |
| SIRI | **Monocyte count (×10^9/L)× NLR** |
| PIV | **Neutrophil count (×10^9/L)×monocyte count (×10^9/L)×PLR** |
| PNI | **Albumin (g/L) + 5 × lymphocyte count (×10^9/L)** |
| FARI | **Fibrinogen(g/L)/Albumin (g/L)** |
| ALRI | **Aspartate Aminotransferase (AST, U/L) / Lymphocyte Count (×10^9/L)** |
| APRI | **(AST (U/L)/40) ×100 / Platelet count (×10^9/L)** |
| AAPR | **Albumin (g/L) / Alkaline Phosphatase (U/L)** |
| dNLR | **Neutrophils count(×10^9/L) / (White Blood Cell count(×10^9/L) - Neutrophils count(×10^9/L))** |
| PALBI | **2.02×log10Bilirubin (μmol/L)－0.37×log10Bilirubin (μmol/L)2－0.04×Albumin (g/L)－3.48×log10Platelet count (×10^9/L)＋1.01×(log10Platelet count (×10^9/L))2** |
| ALBI | **(log10 Bilirubin (μmol/L) × 0.66) + (Albumin (g/L) × (-0.085))** |

PLR, platelet-to-lymphocyte ratio; NLR, neutrophil-to-lymphocyte ratio;LMR, lymphocyte-to-monocyte ratio; SII, systemic immune-inflammation index; SIRI, systemic inflammation response index; PIV, pan-immune-inflammation value; PNI, prognostic nutritional index; FARI, fibrinogen-to-albumin ratio index; ALRI, aspartate aminotransferase-to-lymphocyte ratio; APRI,aspartate aminotransferase-to-platelet ratio; AAPR, albumin-to-alkaline phosphatase ratio; dNLR, derived neutrophil-to-lymphocyte ratio; ALBI, albumin-bilirubin index; PALBI, platelet-albumin-bilirubin index
